# Supplementary material for: LC–MS Based Metabolomics Study of the Effects of EGCG on A549 Cells
Source: PubMed Central journal article supplement (PMC8505700; doi:10.3389/fphar.2021.732716), 2021-09-28
Supplement: Presentation1.pdf [file Presentation1.pdf]

## *Supplementary Material*

### 1 Supplementary Figures and Tables

#### 1.1 Supplementary Figures

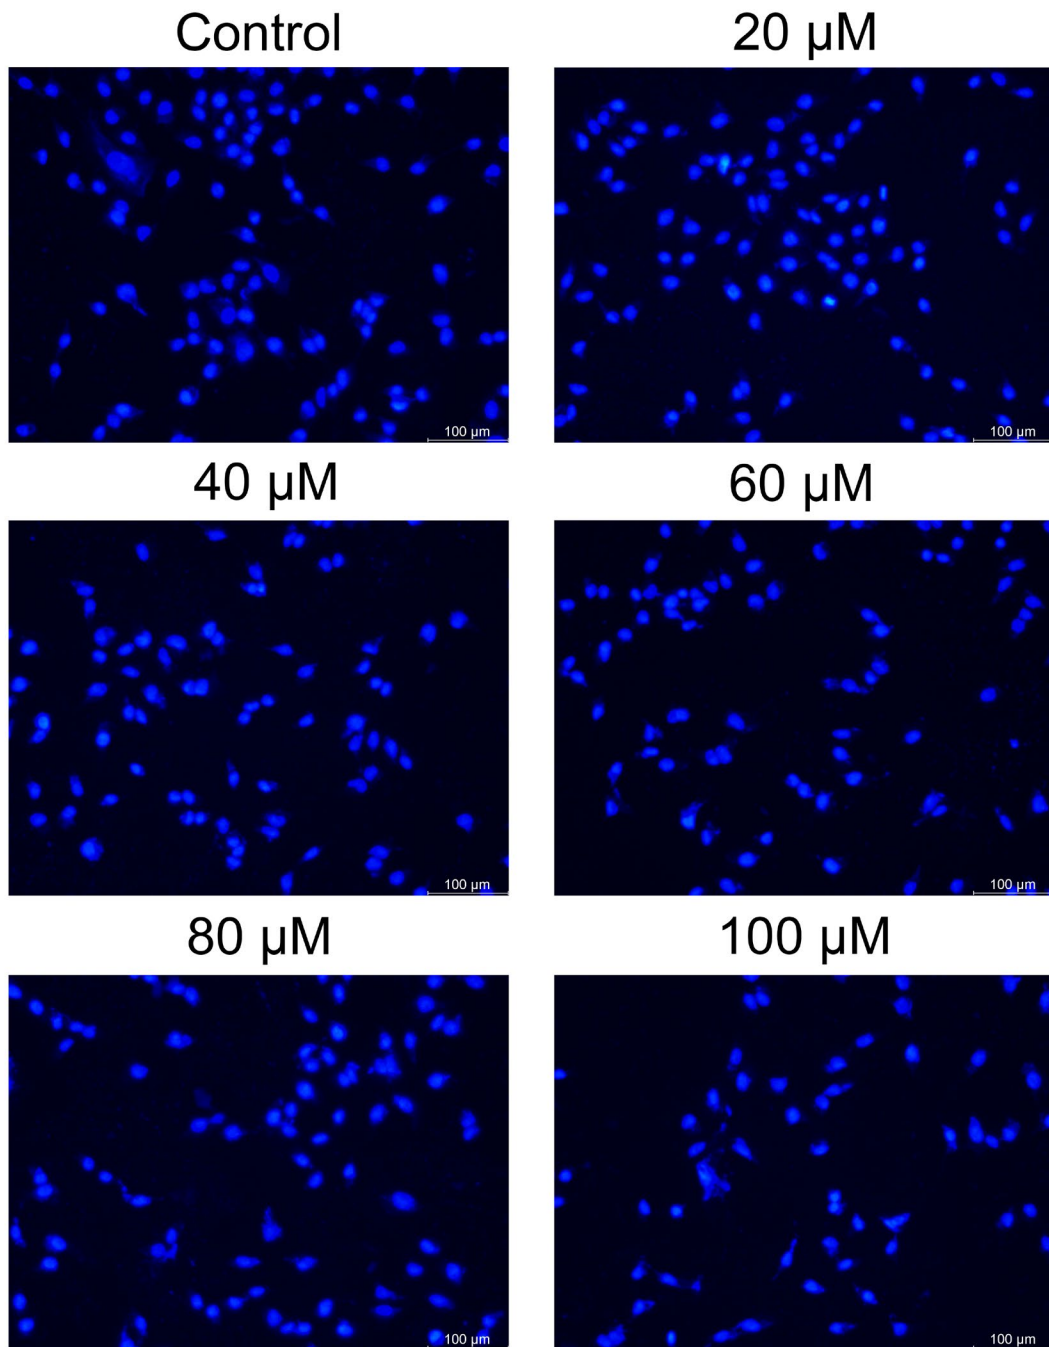

**Supplementary Figure 1.** Fluorescence staining with 4', 6-diamidino-2-phenylindole (DAPI) of A549 cells after EGCG treatment for 24h.

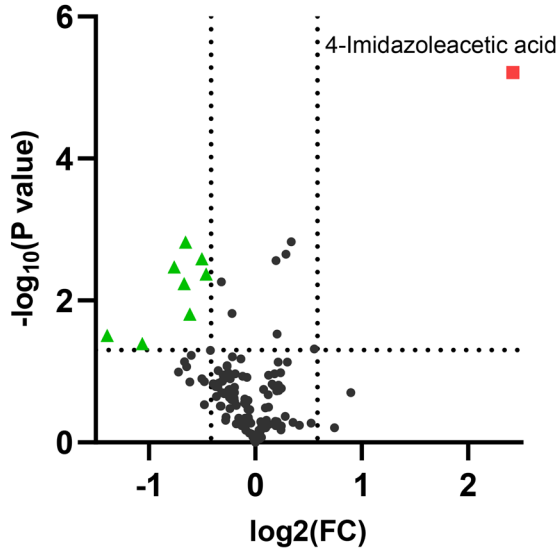

**Supplementary Figure 2.** Volcano plot analysis of differential metabolites in A549 cells after exposure to 40  $\mu$ M EGCG. The x-axis represents  $\log_2$  (fold change), while the y-axis represents p-value in  $-\log_{10}$  scale. The significantly up-regulated metabolites were indicated in red squares, and up-regulated in green triangles. ( $p < 0.05$  and fold change  $> 1.5$  or  $< 0.75$ ).

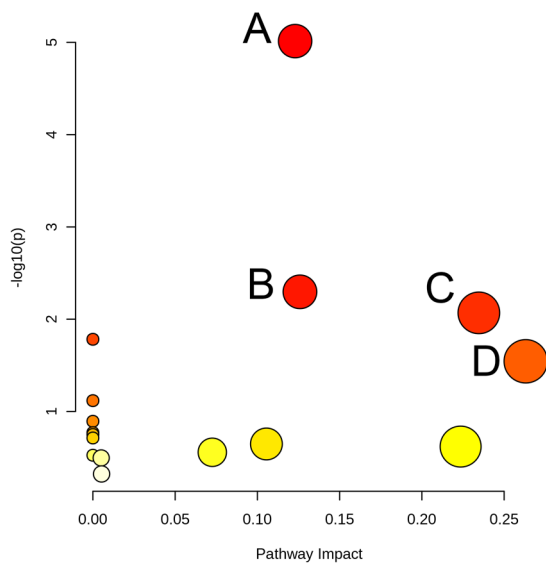

**Supplementary Figure 3.** Pathway analysis overview depicting altered metabolic pathways in A549 cells from control and 40  $\mu$ M EGCG-treated groups. The metabolic pathways are displayed as distinctly colored circles depending on their enrichment analyses scores (vertical axis, shade of red) and topology (pathway impact, horizontal axis, circle diameter) via MetaboAnalyst 5.0. A: Histidine metabolism, B: Arginine and proline metabolism, C: Nicotinate and nicotinamide metabolism, D: beta-Alanine metabolism.

## 1.2 Supplementary Tables

**Supplementary Table 1.** Potential biomarkers in 80  $\mu$ M EGCG-treated A549 cells compared to controls.

| Metabolite             | p.value   | Fold Change |
|------------------------|-----------|-------------|
| Agmatine               | 8.640E-06 | 0.48        |
| 4-Imidazoleacetic acid | 2.220E-05 | 18.13       |
| Glutathione reduced    | 6.860E-05 | 0.39        |
| Cytosine               | 1.360E-04 | 0.50        |
| Acetohydroxamic acid   | 0.001     | 0.43        |
| 2-Deoxycytidine        | 0.001     | 0.48        |
| Asparagine             | 0.003     | 1.69        |
| Cytidine               | 0.019     | 1.84        |
| Acetylcholine          | 0.023     | 0.57        |
| Imidazole              | 0.030     | 1.64        |
| Amino valerate         | 0.050     | 1.80        |

**Supplementary Table 2.** Potential biomarkers in 40  $\mu$ M EGCG-treated A549 cells compared to controls.

|                        | p.value   | Fold<br>Change |
|------------------------|-----------|----------------|
| 4-Imidazoleacetic acid | 6.150E-06 | 5.36           |
| Cytosine               | 0.002     | 0.64           |
| Agmatine               | 0.003     | 0.71           |
| 2-Deoxycytidine        | 0.003     | 0.59           |
| Glutathione reduced    | 0.004     | 0.73           |
| 1-Methylhistidine      | 0.006     | 0.63           |
| Stearic acid           | 0.016     | 0.65           |
| Adenine                | 0.031     | 0.38           |
| Urocanic acid          | 0.040     | 0.48           |

**Supplementary Table 3.** The disturbed metabolites with  $p < 0.05$  in 40  $\mu\text{M}$  EGCG-treated A549 cells compared to controls.

|                                          | p.value   | Fold Change |
|------------------------------------------|-----------|-------------|
| 4-Imidazoleacetic acid                   | 6.150E-06 | 5.36        |
| Proline                                  | 0.001     | 1.27        |
| Cytosine                                 | 0.002     | 0.64        |
| PEP                                      | 0.002     | 1.22        |
| Agmatine                                 | 0.003     | 0.71        |
| Aspartate                                | 0.003     | 1.15        |
| 2-Deoxycytidine                          | 0.003     | 0.59        |
| Glutathione reduced                      | 0.004     | 0.73        |
| 2-Methylglutaric acid                    | 0.005     | 0.80        |
| 1-Methylhistidine                        | 0.006     | 0.63        |
| 2/3-Aminoisobutyric acid/Dimethylglycine | 0.015     | 0.86        |
| Stearic acid                             | 0.016     | 0.65        |
| NAD                                      | 0.030     | 1.15        |
| Adenine                                  | 0.031     | 0.38        |
| Urocanic acid                            | 0.040     | 0.48        |
| Spermidine                               | 0.048     | 1.47        |

PEP phosphoenolpyruvate, NAD nicotinamide adenine dinucleotide

**Supplementary Table 4.** Metabolite pathway changes with 80  $\mu$ M EGCG-treated A549 cells compared to controls.

|                                             | Total | Expected | Hits | Raw p    | Holm p   | FDR      | Impact  |
|---------------------------------------------|-------|----------|------|----------|----------|----------|---------|
| Glycine, serine and threonine metabolism    | 33    | 0.63871  | 6    | 2.40E-05 | 0.002014 | 0.002014 | 0.62837 |
| Aminoacyl-tRNA biosynthesis                 | 48    | 0.92903  | 5    | 0.001834 | 0.15224  | 0.077039 | 0.16667 |
| Alanine, aspartate and glutamate metabolism | 28    | 0.54194  | 3    | 0.01547  | 1        | 0.43317  | 0.27164 |
| Glyoxylate and dicarboxylate metabolism     | 32    | 0.61935  | 3    | 0.022234 | 1        | 0.44081  | 0.14815 |
| Arginine biosynthesis                       | 14    | 0.27097  | 2    | 0.028532 | 1        | 0.44081  | 0       |
| Arginine and proline metabolism             | 38    | 0.73548  | 3    | 0.034979 | 1        | 0.44081  | 0.10399 |
| Histidine metabolism                        | 16    | 0.30968  | 2    | 0.036734 | 1        | 0.44081  | 0       |
| Pantothenate and CoA biosynthesis           | 19    | 0.36774  | 2    | 0.050506 | 1        | 0.51756  | 0.00714 |
| Citrate cycle (TCA cycle)                   | 20    | 0.3871   | 2    | 0.055453 | 1        | 0.51756  | 0.10354 |
| Riboflavin metabolism                       | 4     | 0.077419 | 1    | 0.075271 | 1        | 0.63228  | 0.5     |
| Glutathione metabolism                      | 28    | 0.54194  | 2    | 0.10035  | 1        | 0.76633  | 0.34469 |
| D-Glutamine and D-glutamate metabolism      | 6     | 0.11613  | 1    | 0.11082  | 1        | 0.77576  | 0       |
| Glycerophospholipid metabolism              | 36    | 0.69677  | 2    | 0.15228  | 1        | 0.98399  | 0.02582 |
| Biotin metabolism                           | 10    | 0.19355  | 1    | 0.17801  | 1        | 1        | 0.2     |
| Butanoate metabolism                        | 15    | 0.29032  | 1    | 0.25511  | 1        | 1        | 0       |
| Nicotinate and nicotinamide metabolism      | 15    | 0.29032  | 1    | 0.25511  | 1        | 1        | 0       |
| Fructose and mannose metabolism             | 20    | 0.3871   | 1    | 0.3252   | 1        | 1        | 0.03313 |
| beta-Alanine metabolism                     | 21    | 0.40645  | 1    | 0.33843  | 1        | 1        | 0       |
| Sphingolipid metabolism                     | 21    | 0.40645  | 1    | 0.33843  | 1        | 1        | 0       |
| Galactose metabolism                        | 27    | 0.52258  | 1    | 0.4127   | 1        | 1        | 0       |
| Porphyrin and chlorophyll metabolism        | 30    | 0.58065  | 1    | 0.44675  | 1        | 1        | 0       |
| Cysteine and methionine metabolism          | 33    | 0.63871  | 1    | 0.47889  | 1        | 1        | 0.02184 |
| Amino sugar and nucleotide sugar metabolism | 37    | 0.71613  | 1    | 0.51894  | 1        | 1        | 0.00585 |
| Pyrimidine metabolism                       | 39    | 0.75484  | 1    | 0.53784  | 1        | 1        | 0.00505 |
| Primary bile acid biosynthesis              | 46    | 0.89032  | 1    | 0.59848  | 1        | 1        | 0.00758 |
| Fatty acid biosynthesis                     | 47    | 0.90968  | 1    | 0.60649  | 1        | 1        | 0       |
| Purine metabolism                           | 65    | 1.2581   | 1    | 0.72683  | 1        | 1        | 0       |
